# Supplementary material for: Alleles of CYP3A5 and their association with renal function in chronic kidney disease
Source: PeerJ. 2025 May 2;13:e19424. doi: 10.7717/peerj.19424 (PMC12051937; doi:10.7717/peerj.19424)
Supplement: Supplemental Information 1 — Clinical information, patient demographics, and genotyping results. These data were used for statistical analysis to compare the distribution of CYP3A5 polymorphisms and their association with renal parameters. [file peerj-13-19424-s001.xlsx]

## Sheet: Sheet1
Table S1. Clinical characteristics and CYP3A5 genotypes of participants
No	Group	Sex	Age (years)	BMI (kg/m2)	CYP3A5 polymorphisms	CYP3A5 genotype	Hypertension [1 = HT diagnosed, 0 = Non-HT]	SBP (mmHg)	DBPmean	Diabetes [1 = DM diagnosed, 0 = Non-DM]	FPG (fasting plasma glucose) (mg/dl)	HbA1c (%)	CKD staging	eGFR-EPI (ml/min/1.73 m2)	Serum Creatinine (mg/dL)	Serum creatinine clearance (ml/min)	Urine creatinine (mg/dL)	Urine Microalbumin (mg/dL)	UACR (mg/g)	Albuminuria status
1	CKD	female	62	23.6	CYP3A5*1/*3	A/G	0	127.5	80.5	0	80	5.3	2	66.9	0.92	57.9524	28.8	0.4	6.4	1
2	Control	female	64	18.4	CYP3A5*1/*3	A/G	0	134.5	74.5	0	80	5.6	2	75.9	0.82	46.2835	151.28	2.4	16.4	1
3	CKD	male	79	22.6	CYP3A5*3/*3	G/G	1	149	101.5	0	86	5	3a	53.9	1.26	34.2251	191.26	3.9	9.9	1
4	Control	male	43	25.8	CYP3A5*1/*1	A/A	0	118.5	77	0	81	5.1	2	73.6	1.2	83.3032	169.28	0.4	3.1	1
5	Control	female	66	21.5	CYP3A5*3/*3	G/G	0	115.5	78.5	0	130	5.6	1	91	0.69	62.7987	62.45	0.5	5.1	1
6	CKD	male	62	16.8	CYP3A5*3/*3	G/G	0	140	78	0	74	5.3	3b	36	1.94	20.2706	113.4	7.8	74.2	2
7	CKD	female	47	30.9	CYP3A5*1/*3	A/G	0	132	86.5	0	90	5.8	1	92.2	0.77	115.067	148.77	15.8	74.6	2
8	Control	female	59	24.2	CYP3A5*1/*3	A/G	0	129	76	0	90	5.5	2	84.8	0.77	66.9375	115.64	0.4	3.3	1
9	Control	male	60	19.6	CYP3A5*1/*3	A/G	0	101.5	70	0	77	5.8	2	86.7	0.95	60.117	78.49	0.2	3.1	1
10	Control	female	62	23.1	CYP3A5*3/*3	G/G	0	115.5	84	0	104	5.3	1	94.5	0.67	69.4061	31.66	0.19	6.6	1
11	CKD	male	78	21.8	CYP3A5*3/*3	G/G	1	149	69.5	1	93	9	2	65.4	1.08	43.6137	65.2	1.1	34.5	2
12	CKD	female	38	23.1	CYP3A5*3/*3	G/G	0	125	75.5	0	80	5.8	2	88.5	0.84	73.1101	105.13	0.5	4.8	1
13	CKD	female	61	25.3	CYP3A5*3/*3	G/G	1	140.5	93.5	1	94	7.5	3a	58.1	1.04	56.7654	120.19	0.7	4.9	1
14	CKD	female	72	17.4	CYP3A5*3/*3	G/G	0	104.5	55	0	116	4.8	2	60.8	0.94	27.1578	78.59	0.4	6.5	1
15	CKD	female	85	17	CYP3A5*1/*3	A/G	0	142	83.5	0	91	5	3a	45.4	1.11	17.8413	50.41	0.5	20	1
16	CKD	female	50	25	CYP3A5*3/*3	G/G	1	141	90.5	0	95	5.7	1	104.9	0.63	82.8075	70.43	17.1	57.9	2
17	Control	male	64	23.6	CYP3A5*1/*3	A/G	0	115.5	76.5	0	105	6	2	85.3	0.94	70.6324	76.65	0.2	2.4	1
18	CKD	male	53	19.9	CYP3A5*3/*3	G/G	0	115	73.5	0	107	5.3	2	77.1	1.09	54.8739	79.38	0.4	5.4	1
19	Control	female	49	22.6	CYP3A5*1/*1	A/A	0	105	75	0	74	4.9	2	74.3	0.91	65.4028	220.4	0.6	3.2	1
20	Control	female	72	16.3	CYP3A5*1/*3	A/G	0	132.5	77	0	85	5.5	2	79.9	0.75	36.8207	87.58	0.2	6.8	1
21	Control	male	64	22.6	CYP3A5*3/*3	G/G	0	120.5	79.5	0	101	5.9	1	94.9	0.79	78.1646	116.96	0.5	3	1
22	Control	female	68	31.6	CYP3A5*3/*3	G/G	0	135	80	0	83	5.9	2	89.3	0.7	95.9286	192.29	2.9	15.2	1
23	Control	female	53	23.3	CYP3A5*1/*3	A/G	0	128	82.5	0	98	5.5	2	76.3	0.87	70.9514	90.97	0.6	4.6	1
24	CKD	female	72	20.4	CYP3A5*3/*3	G/G	1	159	63.5	1	88	9	2	62.4	0.92	37.7829	82.64	3.2	24.5	1
25	CKD	female	83	19.2	CYP3A5*3/*3	G/G	0	153	78.5	0	95	5.6	2	66.4	0.82	30.5274	59.14	36.2	68.2	2
26	Control	female	49	26.9	CYP3A5*1/*3	A/G	0	107.5	62	0	93	5.4	2	84.3	0.82	85.9444	49.6	0.19	2.7	1
27	CKD	male	82	20.8	CYP3A5*3/*3	G/G	1	152.5	92	0	82	6.1	3a	59.6	1.14	35.2607	144.72	6.9	17	1
28	CKD	female	62	30.6	CYP3A5*1/*1	A/A	0	123	76	0	87	5.7	2	69.7	0.89	85.1512	61.56	0.2	3.6	1
29	Control	female	55	38.6	CYP3A5*3/*3	G/G	0	143	88	0	93	5.8	2	74.2	0.88	98.9789	124.62	0.9	7.6	1
30	CKD	female	65	24.9	CYP3A5*1/*3	A/G	0	126	81	1	105	7.2	3a	51.7	1.12	43.4803	142.39	2.9	6.6	1
31	CKD	female	72	20.9	CYP3A5*1/*3	A/G	1	161.5	85	0	123	5.9	1	91.4	0.6	53.2509	18.74	1.6	46.8	2
32	CKD	male	52	24.5	CYP3A5*1/*3	A/G	1	133.5	93.5	0	89	5.9	2	72	1.16	76.8103	205.6	10.2	51.7	2
33	CKD	male	67	20.3	CYP3A5*1/*3	A/G	1	160.5	95.5	0	129	5	3b	36.6	1.86	29.2174	73.72	1.5	16.9	1
34	Control	female	51	24.4	CYP3A5*1/*3	A/G	0	135	87	0	91	5.8	2	81.9	0.83	74.9411	96.18	1.6	25.2	1
35	Control	female	71	25.2	CYP3A5*3/*3	G/G	0	129.5	75	0	110	5.6	2	62.8	0.92	55.6042	24.07	0.19	14.6	1
36	Control	female	73	25.7	CYP3A5*3/*3	G/G	0	129	87	0	96	5.3	2	80.6	0.74	57.6127	39.55	0.3	4.9	1
37	Control	female	50	23.2	CYP3A5*1/*3	A/G	0	121.5	83	0	89	5.4	2	86.2	0.8	75.7031	89.8	0.4	8.7	1
38	CKD	female	70	26.7	CYP3A5*3/*3	G/G	0	127	83	0	71	5.2	3a	55.2	1.03	52.6321	72.1	4.7	39	2
39	CKD	male	58	21.9	CYP3A5*3/*3	G/G	0	129	91.5	0	88	5.5	2	78.8	1.04	63.6245	201.7	0.6	0.7	1
40	Control	male	55	22.6	CYP3A5*1/*3	A/G	0	118.5	68	0	75	5.2	2	83.3	1.01	66.6254	207.59	0.7	3.9	1
41	CKD	female	58	26.1	CYP3A5*1/*3	A/G	1	145	81.5	1	191	8	2	70.7	0.9	69.8076	11.13	2	65.1	2
42	Control	female	58	20.3	CYP3A5*1/*1	A/A	0	111	85	0	84	5.7	2	81.5	0.8	57.8413	46.95	0.19	7.1	1
43	CKD	female	73	27.5	CYP3A5*3/*3	G/G	1	162.5	78.5	1	169	8.8	2	65.4	0.88	54.1996	59.01	39.2	208.2	2
44	CKD	male	71	26.1	CYP3A5*1/*3	A/G	0	141	87	0	75	5.8	2	69.5	1.07	61.2617	160.94	82.5	543.3	3
45	Control	female	51	21	CYP3A5*1/*3	A/G	0	108	63.5	0	79	5	2	81.9	0.83	63.0417	150.78	0.5	12.6	1
46	CKD	male	50	27.1	CYP3A5*1/*1	A/A	1	143	87	0	79	5.3	2	72.3	1.17	86.9658	120.67	5.6	16.5	1
47	Control	female	53	26.8	CYP3A5*1/*1	A/A	0	118	68.5	0	76	5.5	2	84.4	0.8	85.5047	164.47	0.5	3	1
48	CKD	female	43	24.5	CYP3A5*1/*1	A/A	0	107	65	0	82	4.8	2	69.2	1	58.7456	225.56	0.2	3.2	1
49	CKD	male	73	27.9	CYP3A5*3/*3	G/G	0	121	76	0	106	6.3	3b	41.8	1.61	43.4067	143.39	2.3	2	1
50	Control	female	54	31.8	CYP3A5*3/*3	G/G	0	119	81.5	0	91	5.7	1	90.7	0.75	96.9252	29.83	0.19	6.1	1
51	Control	female	62	21.4	CYP3A5*3/*3	G/G	0	119	66.5	0	97	5.4	1	93.6	0.69	67.9281	72.61	0.8	11.3	1
52	CKD	female	75	19.1	CYP3A5*1/*3	A/G	1	138.5	76.5	1	112	6	3a	58.8	0.95	37.9642	35.53	0.2	5.6	1
53	CKD	male	63	21	CYP3A5*1/*3	A/G	0	118.5	82	0	84	5.6	2	71.1	1.1	54.1528	124.13	0.6	5	1
54	Control	female	75	25	CYP3A5*3/*3	G/G	0	120.5	82	0	94	5.9	2	85.8	0.68	71.0938	170.51	0.4	10.6	1
55	CKD	female	77	22.6	CYP3A5*3/*3	G/G	0	126	63	0	143	4.6	3a	47	1.13	34.2257	212.91	1.7	4.9	1
56	Control	male	51	22.4	CYP3A5*1/*1	A/A	0	119.5	81.5	0	87	5.5	1	91.1	0.96	80.7335	178.31	0.6	3	1
57	Control	female	27	22	CYP3A5*1/*3	A/G	0	107	66	0	81	5.5	1	97	0.83	91.614	163.03	1.1	7.8	1
58	Control	female	53	27.5	CYP3A5*3/*3	G/G	0	135.5	75.5	0	137	6.1	2	83.2	0.81	82.0399	107.44	0.7	10.8	1
59	Control	female	56	24	CYP3A5*3/*3	G/G	0	130.5	83.5	0	92	4.9	1	99.6	0.65	87.1141	56.31	0.19	9	1
60	Control	male	58	20.6	CYP3A5*1/*3	A/G	0	113	77	0	80	NA	1	90.2	NA	NA	NA	NA	8.5	1
61	Control	male	61	23.6	CYP3A5*3/*3	G/G	0	116	78.5	0	77	5.7	2	88.3	0.93	71.2605	79.67	0.3	6.2	1
62	Control	male	40	20.3	CYP3A5*1/*3	A/G	0	112	71.5	0	100	5.7	1	99.7	0.95	74.1228	81.21	0.4	8.5	1
63	CKD	female	68	27.7	CYP3A5*1/*1	A/A	0	142.5	85	1	93	6.5	2	68.7	0.87	64.4828	150.74	1	6.9	1
64	Control	female	56	27.5	CYP3A5*1/*1	A/A	0	143.5	93	0	90	5.7	1	99.1	0.66	94.0581	73.21	0.4	10.8	1
65	Control	female	51	18.9	CYP3A5*1/*3	A/G	0	113	79	0	70	NA	2	75.3	NA	NA	NA	NA	3.8	1
66	Control	female	55	29.7	CYP3A5*1/*3	A/G	0	135.5	84.5	0	94	5.7	2	79.6	0.83	85.1138	54.57	0.4	13.7	1
67	Control	female	57	27	CYP3A5*1/*1	A/A	0	142.5	87	0	90	5.6	1	93.3	0.72	87.6431	96.79	0.2	3.1	1
68	Control	female	42	23	CYP3A5*1/*3	A/G	0	113	84.5	0	81	4.9	1	91.2	0.8	75.2014	22.23	0.19	6.8	1
69	Control	female	53	21.8	CYP3A5*3/*3	G/G	0	114	70.5	0	90	5.1	2	89.8	0.76	66.6253	21.42	0.4	4.4	1
70	CKD	female	36	23.7	CYP3A5*1/*1	A/A	0	111.5	76.5	0	76	5	1	108.1	0.72	98.9043	196.48	1.3	10.4	1
71	CKD	male	41	24.4	CYP3A5*1/*1	A/A	1	153.5	109	1	198	10.2	1	107.2	0.87	111.422	45.38	7	131.4	2
72	CKD	female	45	34.7	CYP3A5*3/*3	G/G	0	137	93.5	0	123	5.8	1	105	0.7	167.108	162.69	14.2	35.8	2
73	Control	female	51	23.4	CYP3A5*3/*3	G/G	0	105.5	65.5	0	80	5.4	2	85.6	0.8	76.438	60.76	0.19	4.3	1
74	Control	female	63	26.4	CYP3A5*3/*3	G/G	0	113.5	81	0	78	5	2	75.3	0.83	66.37	171.91	0.5	6.3	1
75	Control	female	47	19.9	CYP3A5*1/*1	A/A	0	102	63.5	0	84	5.3	1	96.8	0.74	64.6881	71.5	0.19	5.7	1
76	Control	male	54	25.6	CYP3A5*3/*3	G/G	0	125	88.5	0	85	5.1	2	84.9	1	79.55	68.76	0.3	4.3	1
77	CKD	female	64	20.5	CYP3A5*1/*3	A/G	1	157.5	76.5	0	85	4.7	2	63.5	1.2	33.272	183.85	1.7	8.3	1
78	CKD	female	65	21.3	CYP3A5*1/*3	A/G	0	135.5	72.5	0	102	6.1	2	71.1	0.86	51.2718	80.62	2.9	96	2
79	CKD	male	60	25.8	CYP3A5*3/*3	G/G	1	147.5	85	0	79	5.4	2	82.4	0.99	71.8294	92.04	12.6	106.8	2
80	Control	female	63	27.9	CYP3A5*3/*3	G/G	0	133	81	0	82	5.8	2	77.5	0.81	73.0589	62	0.19	2.9	1
81	CKD	male	67	23	CYP3A5*1/*1	A/A	0	120	79.5	0	110	4.8	2	68.3	1.11	55.9009	128.81	11.5	48.8	2
82	CKD	male	50	26.9	CYP3A5*1/*3	A/G	0	134.5	87.5	0	94	6	1	90.6	0.97	101.16	85.95	0.7	11.4	1
83	Control	female	48	18.5	CYP3A5*3/*3	G/G	0	106.5	70.5	0	80	5.6	2	65.2	1.02	46.8519	104.08	0.2	3.8	1
84	CKD	male	54	21.9	CYP3A5*1/*1	A/A	0	139.5	88	1	171	9	3a	48.1	1.6	42.7014	51.48	30.7	310	3
85	Control	female	73	27.7	CYP3A5*1/*3	A/G	0	137	65.5	0	84	5.7	2	87.9	0.66	63.3976	28.14	0.19	5.4	1
86	Control	female	48	18.5	CYP3A5*1/*3	A/G	0	107	82	0	91	5.6	2	68.4	0.98	55.4138	27.69	0.19	7.1	1
87	Control	female	53	18.4	CYP3A5*1/*3	A/G	0	112	75.5	0	97	5.3	1	95.9	0.72	59.9132	42.74	0.19	8.3	1
88	Control	female	51	26.5	CYP3A5*3/*3	G/G	0	108	73	0	99	6	2	74.3	0.9	75.2998	70.11	0.8	12.6	1
89	Control	female	56	31.4	CYP3A5*1/*3	A/G	0	134	90.5	0	89	6.1	2	82.7	0.8	91.8531	149.2	0.6	4.9	1
90	CKD	male	63	21.8	CYP3A5*3/*3	G/G	0	134	89	0	96	5.2	2	73.5	1.07	54.0719	66.84	2.3	36	2
91	Control	male	66	22.9	CYP3A5*3/*3	G/G	0	126	84	0	81	NA	1	97.2	NA	NA	NA	NA	14	1
92	Control	female	62	27.1	CYP3A5*1/*3	A/G	0	141	76	0	99	6	1	95	0.66	83.8516	23.38	0.19	6.5	1
93	Control	female	53	25.4	CYP3A5*1/*1	A/A	0	119	77	0	79	5.3	1	95.9	0.72	86.8741	176.12	0.5	7.1	1
94	CKD	female	58	21.9	CYP3A5*1/*3	A/G	0	133	85.5	0	84	5.4	2	73.7	0.87	58.8622	84.45	0.4	4.7	1
95	CKD	female	70	26.2	CYP3A5*3/*3	G/G	1	139.5	88	0	94	6.2	3a	59.7	1.22	45.3159	64.59	7.3	191.5	2
96	CKD	female	52	18.8	CYP3A5*1/*3	A/G	0	109	75	0	74	6.2	2	85	0.8	57.7882	100.71	6.2	93.3	2
97	CKD	female	49	28.6	CYP3A5*1/*1	A/A	0	123	80	0	100	6.3	1	102.5	0.69	104.472	208.4	0.9	4.3	1
98	CKD	female	43	25.8	CYP3A5*3/*3	G/G	1	153	94	0	78	5.2	1	94.9	0.77	90.4214	74.5	0.19	6	1
99	Control	male	56	21.2	CYP3A5*1/*3	A/G	0	100.5	72.5	0	104	4.8	1	95.1	0.9	66.1111	25.72	0.19	4.1	1
100	Control	male	42	22.9	CYP3A5*3/*3	G/G	0	127	81.5	0	91	5.5	2	88.1	1.04	85.8547	17.93	0.19	7.5	1
101	Control	female	41	32.1	CYP3A5*3/*3	G/G	0	107	74	0	73	5.1	1	100.9	0.74	124.614	64.57	0.2	3.5	1
102	CKD	male	54	25.7	CYP3A5*1/*3	A/G	1	144	111	0	87	4.8	2	84.9	1	84.5667	137.64	30.9	21.3	1
103	CKD	female	56	23.2	CYP3A5*3/*3	G/G	1	130.5	92	0	103	5.3	1	92.4	0.73	67.6507	12.4	0.8	45.2	2
104	Control	female	47	21.9	CYP3A5*1/*3	A/G	0	117.5	81.5	0	81	4.9	2	78.5	0.88	59.8864	176.15	1.1	7.9	1
105	CKD	female	77	25.1	CYP3A5*1/*3	A/G	1	179.5	86.5	0	131	6.2	2	86.8	0.63	59.3819	45.3	0.4	13.3	1
106	Control	male	65	21.1	CYP3A5*1/*1	A/A	0	112	72	0	86	3.7	1	93.7	0.8	76.9531	38.22	0.19	3.7	1
107	Control	female	58	16.2	CYP3A5*1/*3	A/G	0	121.5	70	0	113	5.4	2	70.7	0.9	37.4315	92.27	0.2	11	1
108	Control	female	65	24.7	CYP3A5*3/*3	G/G	0	131	84	0	79	6.1	2	72.1	0.85	61.9792	62.4	0.6	3.8	1
109	CKD	female	69	20	CYP3A5*1/*3	A/G	1	144	85.5	0	91	4.6	2	89.5	0.68	60.1528	20.23	5.7	83.8	2
110	CKD	male	68	25.5	CYP3A5*1/*1	A/A	0	147.5	80	0	85	4.2	1	92.7	0.78	77.5641	48.38	0.9	41.6	2
111	Control	male	63	24.3	CYP3A5*1/*1	A/A	0	104	69	0	121	5.1	1	93.6	0.83	73.4438	125.02	0.4	4.4	1
112	Control	female	65	28.4	CYP3A5*3/*3	G/G	0	96.5	68.5	0	86	5.5	2	88.2	0.72	79.8105	99.75	0.4	6.5	1
113	CKD	male	58	23	CYP3A5*3/*3	G/G	0	121	85.5	0	86	4.7	1	94.2	0.89	82.9213	301.19	2	6.8	1
114	Control	female	60	32.9	CYP3A5*3/*3	G/G	0	114	63.5	0	130	6	1	92.9	0.71	87.6604	139.78	0.6	4.5	1
115	Control	female	51	27	CYP3A5*3/*3	G/G	0	135	89	0	87	NA	2	73.3	NA	NA	NA	NA	7.3	1
116	CKD	female	47	32.4	CYP3A5*3/*3	G/G	1	175.5	108.5	0	83	4.6	1	96.8	0.74	120.029	59.78	3.9	77.4	2
117	Control	female	45	23.8	CYP3A5*1/*3	A/G	0	132	88.5	0	87	5.7	1	98.2	0.74	89.8738	40.92	0.19	17.4	1
118	Control	female	48	21.9	CYP3A5*1/*3	A/G	0	110	70	0	76	NA	2	83.7	NA	NA	NA	NA	18.7	1
119	Control	female	63	21.9	CYP3A5*3/*3	G/G	0	132.5	85.5	0	87	5.8	2	85.1	0.75	58.4202	63.5	0.4	6.1	1
120	Control	male	70	19.2	CYP3A5*3/*3	G/G	0	120.5	73	0	85	5.1	1	91.5	0.78	60.8262	237.48	0.19	1.2	1
121	CKD	male	68	18.6	CYP3A5*1/*3	A/G	0	134.5	76	0	116	6	2	68.6	1.1	43	52.71	0.19	4.3	1
122	CKD	female	73	18.3	CYP3A5*3/*3	G/G	1	113.5	62.5	1	176	8	3a	53.4	1.04	35.2895	62.72	0.2	4.5	1
123	CKD	female	51	25.4	CYP3A5*1/*1	A/A	0	132.5	80.5	0	90	5.4	1	102.1	0.67	92.9943	158.78	0.6	5.5	1
124	Control	female	55	25.2	CYP3A5*1/*1	A/A	0	122	82	0	100	6.2	2	66.8	0.96	61.2536	126.29	0.9	8.4	1
125	Control	male	56	NA	CYP3A5*3/*3	G/G	0	135	88	0	92	4.9	1	100.4	0.79	NA	17.63	0.19	5.7	1
126	CKD	female	54	28.3	CYP3A5*3/*3	G/G	1	164.5	94	0	86	5.6	1	96.9	0.71	105.103	145.2	55.8	183.7	2
127	CKD	male	59	28.5	CYP3A5*1/*1	A/A	0	134.5	77.5	0	99	5.6	2	77.3	1.05	79.9286	80.46	0.5	5.2	1
128	CKD	female	39	27.7	CYP3A5*1/*1	A/A	1	148.5	81.5	0	82	5.3	1	116.5	0.58	137.944	129.73	5	34.3	2
129	CKD	female	70	20.7	CYP3A5*3/*3	G/G	0	122.5	92.5	0	97	5.4	2	60.1	0.96	40.0282	60.9	0.3	5.9	1
130	CKD	male	83	19	CYP3A5*1/*3	A/G	0	100	66	0	80	NA	3b	43.5	NA	NA	NA	NA	5.3	1
131	CKD	female	62	21.6	CYP3A5*3/*3	G/G	0	117.5	76.5	0	90	5.5	3b	44.5	1.29	31.9793	213.34	1	5.3	1
132	Control	female	51	29.3	CYP3A5*3/*3	G/G	0	116	81	0	81	5	1	95.7	0.73	93.4111	73.85	0.2	5.2	1
133	Control	female	47	26.5	CYP3A5*1/*1	A/A	0	126	83	0	88	5.6	1	93.7	0.76	87.6889	110.72	0.2	3.4	1
134	CKD	female	77	32.4	CYP3A5*3/*3	G/G	0	131	83.5	0	96	5.7	3a	53.2	1.02	49.1458	325.39	1.8	9.9	1
135	CKD	male	77	24	CYP3A5*3/*3	G/G	0	124.5	78	0	91	5.2	2	70.6	1.02	46.924	85.6	0.2	4.5	1
136	CKD	female	53	24.5	CYP3A5*1/*3	A/G	0	119	77.5	0	81	5.4	2	83.2	0.81	74.1782	89.02	0.2	3.5	1
137	Control	female	42	19	CYP3A5*1/*3	A/G	0	110.5	75.5	0	83	5.2	1	98.6	0.75	61.3952	56.62	0.19	8.3	1
138	CKD	female	42	27.8	CYP3A5*3/*3	G/G	0	139	90	0	92	5.8	1	91.2	0.8	85.0354	61.42	0.2	22.1	1
139	Control	female	65	27.3	CYP3A5*1/*3	A/G	0	118	76	0	94	5.7	1	93	0.66	81.1632	189.07	0.4	6.5	1
140	CKD	female	56	30.9	CYP3A5*3/*3	G/G	0	164	89	0	78	6	1	104.6	0.56	120.24	47.15	4.3	60.2	2
141	Control	female	28	31.2	CYP3A5*3/*3	G/G	0	132	88	0	86	NA	2	83.9	NA	NA	NA	NA	20.6	1
142	Control	female	59	31	CYP3A5*1/*1	A/A	0	128.5	87.5	0	89	5.8	2	61.8	1	75.2569	232.27	0.8	6.5	1
143	Control	female	56	28.6	CYP3A5*1/*3	A/G	0	128.5	80	0	80	5.9	2	83.9	0.79	85.4842	131.99	0.4	7.1	1
144	CKD	female	77	21.9	CYP3A5*1/*1	A/A	0	119.5	70	0	95	5.7	3b	40.8	1.27	27.7589	302.2	2.8	7.4	1
145	Control	female	59	28.7	CYP3A5*3/*3	G/G	0	108.5	66	0	84	5.7	2	76.3	0.84	72.4018	224.93	1	4.7	1
146	CKD	female	77	26	CYP3A5*1/*3	A/G	1	134.5	95	0	97	6.1	3a	58.7	0.94	43.2799	126.38	0.4	5.3	1
147	Control	female	59	33.2	CYP3A5*3/*3	G/G	0	124	80	0	94	NA	1	92	NA	NA	NA	NA	15.2	1
148	CKD	female	77	19.5	CYP3A5*3/*3	G/G	1	133.5	61.5	0	87	5.7	4	27.1	1.78	18.3848	111.13	1.4	4.4	1
149	Control	female	53	26.5	CYP3A5*1/*3	A/G	0	119.5	79	0	83	5.2	1	92.8	0.74	86.3305	91.2	3	18.1	1
150	Control	female	61	NA	CYP3A5*1/*3	A/G	0	119	67	0	94	5.7	2	71.1	0.88	NA	73.51	0.19	10.6	1
151	CKD	male	61	20	CYP3A5*1/*3	A/G	0	103	71	0	105	NA	1	94.5	NA	NA	NA	NA	4.2	1
152	CKD	male	64	20.5	CYP3A5*1/*1	A/A	0	109.5	74.5	0	68	5.1	2	73.8	1.06	47.8983	159.7	0.19	7.2	1
153	CKD	female	56	33.3	CYP3A5*3/*3	G/G	1	127	92.5	0	85	6	2	60.4	1.31	60.8626	141.1	0.7	3.7	1
154	CKD	female	67	27.8	CYP3A5*1/*3	A/G	0	125	87.5	0	73	6.2	2	68.2	0.88	64.5375	98.8	72.8	167.9	2
155	CKD	male	75	24.2	CYP3A5*1/*1	A/A	0	125	82.5	0	90	5.7	2	81.1	0.92	59.0731	77.6	0.4	1.7	1
156	Control	female	51	24.7	CYP3A5*1/*3	A/G	0	107.5	67	0	76	4	2	88.3	0.78	78.8021	54.92	0.19	7	1
157	Control	male	49	23.3	CYP3A5*3/*3	G/G	0	118.5	78	0	106	5.4	2	82	1.06	78.8142	107.05	1	3.4	1
158	CKD	male	39	17.4	CYP3A5*3/*3	G/G	1	134	97.5	0	81	5.5	1	125	0.62	109.96	119.29	22.4	67.6	2
159	CKD	female	52	23.1	CYP3A5*1/*3	A/G	0	137	92.5	0	86	5.3	2	86.3	0.79	66.41	25.16	0.19	7.7	1
160	CKD	female	60	32	CYP3A5*1/*3	A/G	0	140	88.5	0	98	5.3	1	91.3	0.72	96.5432	145.8	1.3	7.9	1
161	CKD	male	69	23	CYP3A5*1/*3	A/G	0	118	70	1	136	6.9	2	82.4	0.94	51.7184	62.58	3.5	48.2	2
162	CKD	female	67	24.2	CYP3A5*1/*3	A/G	1	150.5	93	0	87	5.9	3a	57.7	1.01	45.0528	91.3	0.8	23.8	1
163	CKD	male	74	17.6	CYP3A5*3/*3	G/G	0	129.5	72.5	0	89	6.2	2	68.8	1.06	38.1368	103.9	1.3	9.3	1
164	Control	female	45	31.4	CYP3A5*3/*3	G/G	0	121.5	82.5	0	99	5.4	2	77.5	0.9	89.2238	100.54	0.3	5.7	1
165	CKD	male	56	22.2	CYP3A5*3/*3	G/G	0	116	70.5	0	85	5.7	1	106.8	0.68	96.4216	139.2	1	12.2	1
166	Control	male	58	23.9	CYP3A5*3/*3	G/G	0	123.5	76	0	68	5.1	2	86.8	0.96	75.0955	194.8	1.4	3.3	1
167	CKD	female	68	28	CYP3A5*1/*1	A/A	1	123.5	95	0	81	5	3a	48	1.17	48.6752	180.5	2.2	8.9	1
168	CKD	male	55	26	CYP3A5*1/*1	A/A	0	116.5	78	0	88	6.1	2	64.4	1.25	64.7889	189.2	0.8	4.5	1
169	Control	female	70	21.2	CYP3A5*3/*3	G/G	0	116	73	0	93	5.8	2	81	0.75	50.575	18.2	0.19	6.2	1
170	Control	female	50	27.2	CYP3A5*3/*3	G/G	0	111.5	64.5	0	87	5.3	2	76.9	0.88	70.8736	NA	NA	5.7	1
171	CKD	male	71	17.4	CYP3A5*1/*3	A/G	0	103.5	64	1	94	9	2	88.1	0.84	49.0575	60.1	0.4	9.4	1
172	Control	female	57	27.8	CYP3A5*1/*3	A/G	0	121	82	0	95	6.2	2	74.2	0.87	74.8974	29.3	0.19	11.7	1
173	CKD	female	82	22.7	CYP3A5*3/*3	G/G	0	120.5	75	0	86	5.7	3a	45.4	1.13	31.3276	112.2	1.3	9.5	1
174	CKD	female	71	25.4	CYP3A5*1/*1	A/A	0	127.5	86.5	0	89	5.6	2	86	0.71	61.7248	107.11	0.4	3.3	1
175	CKD	male	67	17.4	CYP3A5*1/*3	A/G	0	112	77	0	78	6	2	66.2	1.14	34.5967	66.5	7.5	116.9	2
176	CKD	male	82	18.4	CYP3A5*1/*3	A/G	0	139	84.5	0	91	5	2	60.2	1.13	28.444	62.98	0.19	4.4	1
177	Control	male	62	21.8	CYP3A5*1/*1	A/A	0	117	82	0	79	5.3	1	91.2	0.9	72.9444	91.71	0.5	7.6	1
178	CKD	male	76	22.8	CYP3A5*1/*3	A/G	1	153	77	0	99	4.6	2	64.9	1.1	45.899	141.3	0.7	6.5	1
179	Control	male	56	26.6	CYP3A5*3/*3	G/G	0	131.5	90	0	83	5.4	2	71.5	1.14	71.5351	48.23	0.4	7.9	1
180	Control	female	60	23.9	CYP3A5*3/*3	G/G	0	136.5	80	0	97	6.3	2	70.7	0.89	68.5518	37.57	0.19	4.6	1
181	Control	male	56	23.5	CYP3A5*3/*3	G/G	0	117.5	73	0	85	5.5	1	92.6	0.92	76.087	141.92	0.6	2.7	1
182	Control	female	64	25.3	CYP3A5*1/*3	A/G	0	145.5	85	0	88	5.1	1	94.1	0.65	77.5752	60.13	0.19	24.3	1
183	CKD	female	46	34.4	CYP3A5*1/*3	A/G	0	120	97	0	83	6.1	1	105.2	0.68	132.514	105.7	41.8	113.4	2
184	Control	female	60	20.2	CYP3A5*3/*3	G/G	0	116	76	0	84	4.9	1	96.3	0.66	69.4024	38.9	0.4	5	1
185	CKD	male	70	23.9	CYP3A5*1/*3	A/G	0	137.5	80	1	103	6.8	2	61.5	1.19	48.366	183.47	0.6	2.5	1
186	CKD	female	43	20.9	CYP3A5*1/*3	A/G	0	102.5	68	0	80	5.5	1	107	0.69	76.8405	157.91	0.8	1.9	1
187	Control	male	45	22.8	CYP3A5*3/*3	G/G	0	137	83	0	84	5.8	1	109.6	0.77	104.185	150.31	4.2	20	1
188	Control	male	50	18.6	CYP3A5*3/*3	G/G	0	108	72	0	87	NA	2	77.9	NA	NA	NA	NA	4.2	1
189	CKD	male	55	22.3	CYP3A5*1/*3	A/G	0	141	76	0	81	5.2	2	84.4	1	71.1875	89.3	1.1	12.3	1
190	Control	female	72	30.7	CYP3A5*1/*3	A/G	0	109	71	0	76	NA	2	89	NA	NA	NA	NA	6.6	1
191	CKD	male	58	19.7	CYP3A5*1/*1	A/A	0	121	88	0	81	5.1	2	77	1.06	60.49	65.2	3.2	87.1	2
192	CKD	female	52	30.6	CYP3A5*1/*1	A/A	0	127.5	91.5	0	90	4.9	2	69.1	0.95	71.6287	187.87	10.1	57.6	2
193	CKD	female	61	31.6	CYP3A5*3/*3	G/G	0	117.5	70.5	0	100	5.3	2	79.8	0.8	76.0101	80.2	0.3	7.5	1
194	CKD	female	56	23.2	CYP3A5*1/*1	A/A	1	143.5	78.5	0	79	5.4	2	81.4	0.81	62.6831	203.9	0.9	4	1
195	Control	female	53	31.2	CYP3A5*1/*3	A/G	0	139	90	0	92	5.2	1	100.7	0.67	117.731	149.02	0.2	6.4	1
196	Control	male	60	32.5	CYP3A5*1/*3	A/G	0	112.5	77	0	93	6	2	67.4	1.17	88.604	155.3	0.6	4.8	1
197	CKD	female	62	19.7	CYP3A5*3/*3	G/G	1	119	74	0	73	5.4	3a	50	1.48	29.616	112.29	0.9	13.7	1
198	Control	male	44	25.8	CYP3A5*1/*3	A/G	0	109	76	0	87	5.9	1	99.5	0.93	98.7814	102	0.3	4.7	1
199	CKD	female	69	29.9	CYP3A5*3/*3	G/G	1	149	79.5	1	117	6.9	2	63.7	0.92	63.5023	129.4	1.1	7.9	1
200	Control	female	69	25.4	CYP3A5*1/*3	A/G	0	123	71.5	0	85	5.4	2	89.5	0.68	73.5885	66.5	1.1	10.6	1
201	Control	male	49	24	CYP3A5*1/*3	A/G	0	125	75.5	0	80	5.4	1	93.6	0.95	89.6696	84.1	0.3	3.5	1
202	Control	female	80	22	CYP3A5*1/*3	A/G	0	118	63	0	78	NA	2	62.3	NA	NA	NA	NA	7.3	1
203	CKD	female	79	16.8	CYP3A5*3/*3	G/G	1	169	62.5	1	87	7.5	3a	54.4	0.99	25.314	37.2	0.4	20.4	1
204	Control	male	46	NA	CYP3A5*1/*3	A/G	0	91	64	0	77	5.5	1	92.1	0.98	NA	157.05	0.5	3	1
205	Control	female	62	22	CYP3A5*1/*3	A/G	0	112	62	0	92	NA	2	76.9	NA	NA	NA	NA	5.5	1
206	Control	male	46	26.6	CYP3A5*1/*3	A/G	0	125	89.5	0	88	5.9	2	75.1	1.16	71.5805	115.6	0.8	5.3	1
207	Control	male	64	21	CYP3A5*1/*3	A/G	0	116	79	0	85	NA	1	93.9	NA	NA	NA	NA	5.8	1
208	Control	female	56	24.8	CYP3A5*3/*3	G/G	0	95	76.5	0	64	5.7	1	98.1	0.68	72.625	107.56	0.3	4.5	1
209	CKD	male	68	30.3	CYP3A5*1/*3	A/G	0	118	79.5	0	111	6.4	3a	55.5	1.31	57.7863	137.77	0.7	3.8	1
210	CKD	male	52	21.4	CYP3A5*1/*1	A/A	0	104	71	0	97	NA	2	67.7	NA	NA	NA	NA	5	1
211	Control	female	60	21.8	CYP3A5*1/*3	A/G	0	113.5	70.5	0	85	5.8	2	86.9	0.75	74.6741	78.7	0.9	17.7	1
212	CKD	female	73	22.1	CYP3A5*3/*3	G/G	1	114.5	74.5	0	91	5.7	3b	39.3	1.34	30.2812	115.46	1.2	6.6	1
213	CKD	male	38	24.1	CYP3A5*3/*3	G/G	0	123.5	80	0	95	5.2	1	105.1	0.92	90.8514	90.4	0.3	10.2	1
214	Control	male	60	23.9	CYP3A5*3/*3	G/G	0	112	68	0	84	6.2	2	73.4	1.09	65.8512	103.4	0.3	3.3	1
215	CKD	female	46	25.5	CYP3A5*3/*3	G/G	0	118	75	0	88	5.1	1	107.9	0.63	107.802	120.82	1.3	4.4	1
216	CKD	female	56	29.9	CYP3A5*1/*3	A/G	0	130	88	0	74	6.1	2	70.8	0.91	75.6282	145.9	17.5	201.1	2
217	CKD	female	68	24.5	CYP3A5*1/*3	A/G	1	151	83.5	1	199	9.7	2	84.9	0.73	61.8288	16.7	0.6	2192.2	3
218	Control	female	51	25.1	CYP3A5*3/*3	G/G	0	123	82	0	88	5.1	2	75.3	0.89	73.5486	49.06	0.19	6.3	1
219	CKD	female	73	NA	CYP3A5*1/*1	A/A	0	135	96	0	85	5.7	3a	49.4	1.11	NA	106.84	1	3.7	1
220	CKD	female	66	20.3	CYP3A5*1/*1	A/A	1	127.5	75.5	0	103	5.2	3a	47.1	1.52	30.4614	157.3	10.3	22.6	1
221	Control	male	65	23	CYP3A5*1/*3	A/G	0	121	75.5	0	94	5.9	1	90.1	0.88	71.6146	156.53	4.6	24	1
222	Control	female	42	25.7	CYP3A5*1/*1	A/A	0	111	75.5	0	74	5.9	1	91.2	0.8	95.7372	110.08	0.5	5.6	1
223	CKD	female	77	29.5	CYP3A5*1/*3	A/G	1	127	72	1	128	6.8	3b	41.9	1.22	39.3822	132.32	0.8	6.8	1
224	Control	male	46	23.6	CYP3A5*1/*1	A/A	0	124	84	0	88	5.5	2	81	1.09	85.6397	215.29	0.7	3.6	1
225	CKD	female	80	19.2	CYP3A5*1/*3	A/G	1	136.5	66.5	0	89	5.8	2	72.6	0.77	33.3009	45.25	1.2	503.4	3
226	CKD	female	79	30	CYP3A5*1/*3	A/G	1	131.5	93	0	78	5.5	3a	54.7	0.98	49.087	49.76	101.6	2343	3
227	Control	female	55	31.3	CYP3A5*3/*3	G/G	0	108	74	0	79	5.7	2	87.2	0.77	92.137	53.78	0.2	5	1
228	Control	male	50	26.2	CYP3A5*1/*1	A/A	0	116	77	0	79	5.4	1	97.3	0.92	97.2826	147.76	1.7	3.2	1
229	CKD	female	59	37.7	CYP3A5*1/*3	A/G	0	119.5	74	0	89	6	3b	32.8	1.69	46.3979	161.69	4.7	17	1
230	CKD	male	66	20.1	CYP3A5*3/*3	G/G	0	128	83	0	113	NA	2	83.1	NA	NA	NA	NA	3	1
231	Control	male	49	NA	CYP3A5*1/*3	A/G	0	NA	NA	0	95	5.7	2	89.1	0.99	NA	229.13	0.4	3.1	1
232	CKD	female	73	18.6	CYP3A5*1/*3	A/G	0	101.5	61.5	0	96	4.9	3a	54.7	1.02	29.9329	44.53	0.4	13.1	1
233	CKD	male	72	18.3	CYP3A5*1/*3	A/G	0	134.5	79.5	0	90	5.8	3a	52.1	1.35	30.7819	293.62	6.6	62	2
234	CKD	male	47	27.4	CYP3A5*1/*1	A/A	0	131.5	94.5	0	83	5.4	1	98.7	0.92	98.4194	67.66	0.3	3.5	1
235	Control	female	42	24.9	CYP3A5*3/*3	G/G	0	133	84.5	0	91	5.5	1	92.6	0.79	98.2671	125.48	0.6	5	1
236	Control	female	45	28	CYP3A5*1/*3	A/G	0	127	76	0	94	5.4	2	87.3	0.82	91.3635	82.4	0.3	2.5	1
237	Control	female	51	20.6	CYP3A5*1/*3	A/G	0	125.5	83	0	92	5.5	2	80.7	0.84	66.0437	21.64	0.2	4.2	1
238	Control	female	47	27.8	CYP3A5*1/*3	A/G	0	112.5	81	0	73	5.6	2	64.1	1.04	74.9539	45.64	0.19	3	1
239	CKD	male	58	29.6	CYP3A5*3/*3	G/G	0	125.5	77	1	141	11	3b	40	1.82	45.8059	131.04	54.8	332	3
240	CKD	male	66	26.1	CYP3A5*3/*3	G/G	0	141.5	88.5	0	84	5.9	3a	56.9	1.3	51.8632	143.52	2.1	3.9	1
241	CKD	male	70	30.6	CYP3A5*1/*3	A/G	0	153	89	1	152	10.9	3a	47.6	1.47	48.4127	99.22	6.2	33.7	2
242	Control	female	51	26.4	CYP3A5*1/*3	A/G	0	135	91	0	82	5.5	1	94.1	0.74	88.7411	73.17	0.19	4.7	1
243	CKD	male	53	30.3	CYP3A5*1/*3	A/G	1	149	100	0	83	5.6	2	76.2	1.1	83.375	184.52	6.4	127	2
244	Control	female	58	NA	CYP3A5*1/*1	A/A	0	NA	NA	0	80	5.7	2	89	0.74	NA	27.31	0.19	6.7	1
245	Control	male	43	25.5	CYP3A5*1/*3	A/G	0	119	70	0	78	5.3	1	101.5	0.92	96.5021	107.22	0.3	9.6	1
246	Control	male	63	26.3	CYP3A5*3/*3	G/G	0	119	76.5	0	98	5.9	1	91.4	0.88	73.2812	142.59	0.9	5.8	1
247	CKD	male	47	28.0689	CYP3A5*3/*3	G/G	1	162	114	0	106	5.9	3a	59.41	1.4	86.7262	130.2	1.42	10.91	1
248	CKD	female	76	36.9795	CYP3A5*3/*3	G/G	1	149	71	0	86	6.1	3a	51.71	1.05	58.2857	53.3	1.16	21.76	1
249	CKD	female	43	31.6337	CYP3A5*3/*3	G/G	0	132	88	0	103	5.3	3a	49.9	1.31	66.4355	59.7	69.63	1129.99	3
250	CKD	male	48	25.0865	CYP3A5*3/*3	G/G	1	149	96	0	111	5.8	3a	47.32	1.68	55.1422	142.7	10.34	72.45	2
251	CKD	male	76	19.1406	CYP3A5*1/*3	A/G	1	158	58	0	95	5.5	3b	44.22	1.51	28.8447	99.5	210.64	2116.35	3
252	CKD	male	70	27.7551	CYP3A5*3/*3	G/G	0	144	77	1	174	8.4	3b	43.67	1.58	52.3031	68.4	11.34	165.89	2
253	CKD	male	78	19.052	CYP3A5*1/*3	A/G	0	170	67	1	102	6.6	3b	43.26	1.52	28.326	72.6	81.94	1128.34	3
254	CKD	male	62	25.0135	CYP3A5*3/*3	G/G	1	149	81	0	88	5.5	3b	41.98	1.71	46.8811	47.7	0.11	2.31	1
255	CKD	female	75	24.3496	CYP3A5*1/*1	A/A	1	145	67	0	95	6.3	3b	41.78	1.26	34.714	305.8	1.25	4.09	1
256	CKD	male	70	22.4082	CYP3A5*3/*3	G/G	0	134	96	0	85	5.4	3b	39.97	1.7	36.6013	47.2	17.3	366.22	3
257	CKD	female	61	22.3703	CYP3A5*3/*3	G/G	0	119	49	0	86	6.2	3b	38.26	1.47	31.088	39	1.54	39.52	2
258	CKD	female	77	25.1747	CYP3A5*1/*3	A/G	1	115	56	1	133	6.1	3b	37.56	1.36	29.75	70.4	1.5	21.3	1
259	CKD	male	70	27.3437	CYP3A5*3/*3	G/G	1	151	78	1	139	6.2	3b	37.55	1.79	38.0199	43.2	195.08	4518.88	3
260	CKD	female	65	20.5693	CYP3A5*3/*3	G/G	1	147	59	1	108	6.2	3b	36.89	1.48	33.5023	57.3	51.88	905.73	3
261	CKD	female	65	18.2222	CYP3A5*1/*3	A/G	1	169	98	1	102	7.3	3b	36.89	1.48	24.5284	16	145.85	9121.33	3
262	CKD	male	61	22.6474	CYP3A5*1/*3	A/G	0	124	77	1	199	8	3b	36.07	1.95	37.6994	115	0.87	7.57	1
263	CKD	female	61	19.1467	CYP3A5*1/*1	A/A	0	119	65	1	117	9.7	3b	33.52	1.64	26.1594	46.9	3.02	64.39	2
264	CKD	female	79	23.9361	CYP3A5*1/*3	A/G	1	139	48	0	99	5.6	3b	33.4	1.49	28.5156	51.3	134.85	2627.63	3
265	CKD	male	67	21.0772	CYP3A5*1/*3	A/G	0	119	67	0	73	5.4	3b	33.34	2.01	28.2477	132.4	0.38	2.87	1
266	CKD	female	68	25.3444	CYP3A5*1/*3	A/G	0	118	68	1	133	8.4	3b	33.12	1.59	36.8868	195.7	5.32	27.19	1
267	CKD	male	74	22.0386	CYP3A5*1/*3	A/G	0	126	59	1	253	7.8	3b	32.12	1.99	27.6382	75.9	173.69	2234.35	3
268	CKD	female	74	26.1427	CYP3A5*3/*3	G/G	0	102	33	1	301	8.8	3b	30.82	1.63	29.637	215.3	31.92	148.28	2
269	CKD	female	59	20.0444	CYP3A5*1/*3	A/G	1	148	67	1	142	6	3b	30.78	1.78	24.2286	51.4	246.46	4794.94	3
270	CKD	male	58	23.1834	CYP3A5*3/*3	G/G	1	139	79	0	82	5.5	3b	30.49	2.28	33.4673	30.5	77.01	2524.92	3
271	CKD	male	79	24.3141	CYP3A5*1/*3	A/G	1	149	56	0	NA	5.6	3b	30.1	2.04	27.8254	86.2	34.24	397.08	3
272	CKD	male	57	27.466	CYP3A5*1/*1	A/A	0	100	74	1	102	8.5	3b	30.07	2.32	38.0615	229.7	347.71	1513.69	3
273	CKD	male	64	20.7967	CYP3A5*1/*3	A/G	0	143	82	1	119	6.5	4	29.87	2.24	27.3313	95.4	3.29	34.5	2
274	CKD	male	61	20.7967	CYP3A5*1/*3	A/G	1	114	65	0	96	6	4	29.86	2.28	27.9118	85.4	61.42	718.87	3
275	CKD	female	67	21.4908	CYP3A5*1/*1	A/A	1	143	75	0	141	5.6	4	28.52	1.81	24.9019	39.6	8.34	210.5	2
276	CKD	female	73	31.1265	CYP3A5*1/*3	A/G	0	151	61	1	105	11.8	4	28.29	1.76	37.1667	20.9	2.62	125.42	2
277	CKD	male	57	30.4687	CYP3A5*3/*3	G/G	0	135	92	1	149	7.7	4	27.08	2.53	35.5402	218.3	36.47	165.22	2
278	CKD	male	65	24.4589	CYP3A5*3/*3	G/G	0	155	82	1	107	5.8	4	27.01	2.42	27.2899	21.6	36.5	1703.22	3
279	CKD	male	65	25.1808	CYP3A5*1/*3	A/G	1	146	53	1	115	5.9	4	26.88	2.43	33.4362	79.9	11.3	141.41	2
280	CKD	male	66	22.8624	CYP3A5*3/*3	G/G	1	156	66	0	105	5.4	4	26.3	2.46	25.0678	67.6	100.73	1489.21	3
281	CKD	female	78	18.6667	CYP3A5*3/*3	G/G	1	141	79	1	131	5.9	4	25.88	1.84	16.7074	48.5	214.74	4427.63	3
282	CKD	female	63	27.6889	CYP3A5*1/*1	A/A	0	142	77	1	140	7.5	4	24.65	2.09	27.0969	17.5	57.57	3299.14	3
283	CKD	male	74	23.3355	CYP3A5*3/*3	G/G	1	160	70	1	84	5.5	4	24.5	2.49	22.8246	62	9.36	151.53	2
284	CKD	male	74	20.8325	CYP3A5*1/*1	A/A	0	120	67	0	95	5.6	4	24.38	2.5	19.8	87.1	1.17	13.43	1
285	CKD	female	32	21.7555	CYP3A5*1/*3	A/G	1	161	100	0	100	6.2	4	24.01	2.29	30.6223	67.8	161.26	2379.17	3
286	CKD	male	72	28.578	CYP3A5*3/*3	G/G	1	140	73	0	91	5.9	4	23.8	2.58	27.4548	110.2	11.47	104.06	2
287	CKD	male	58	25.5859	CYP3A5*1/*3	A/G	1	129	85	0	80	5.5	4	23.48	2.83	26.3594	106.1	106.38	1002.64	3
288	CKD	female	57	27.4714	CYP3A5*3/*3	G/G	0	125	58	1	113	7.4	4	22.55	2.33	27.7557	106.5	356.33	3345.19	3
289	CKD	female	78	27.1111	CYP3A5*3/*3	G/G	1	163	74	0	94	5.9	4	21.81	2.12	21.0607	86.5	21.64	250.09	2
290	CKD	male	69	27.5482	CYP3A5*3/*3	G/G	1	122	60	1	81	6	4	21.37	2.87	25.7695	142.9	287.57	2012.67	3
291	CKD	male	79	25.6732	CYP3A5*3/*3	G/G	0	153	71	1	94	7	4	21.16	2.73	22.2202	66.6	43.01	645.79	3
292	CKD	male	69	25.6055	CYP3A5*1/*3	A/G	1	181	72	1	117	5.8	4	21.02	2.91	25.0764	147.7	129.7	878.43	3
293	CKD	male	79	21.4844	CYP3A5*1/*3	A/G	0	138	75	1	78	6.1	4	20.7	2.78	16.7616	82.4	128.05	1554.57	3
294	CKD	male	59	26.1246	CYP3A5*1/*3	A/G	1	120	70	0	96	6.4	4	20.56	3.14	27.0502	106.4	34.33	322.68	3
295	CKD	male	79	22.706	CYP3A5*3/*3	G/G	1	132	59	0	103	6.3	4	20.44	2.81	17.5474	129	78.89	611.46	3
296	CKD	male	43	23.3564	CYP3A5*1/*3	A/G	1	136	89	0	84	5.6	4	20.25	3.49	26.0566	140.6	50.89	362	3
297	CKD	female	55	21.6441	CYP3A5*1/*3	A/G	0	158	80	0	96	5.5	4	19.48	2.66	19.6168	62.8	124.76	1985.99	3
298	CKD	male	72	20.7612	CYP3A5*3/*3	G/G	1	167	87	0	82	5.4	4	19.06	3.1	18.2796	19.6	148.36	7565.53	3
299	CKD	male	69	22.0386	CYP3A5*1/*3	A/G	1	137	73	1	84	5.4	4	18.81	3.19	18.5475	100.9	154.46	1531.43	3
300	CKD	male	41	23.6547	CYP3A5*1/*1	A/A	1	175	101	0	80	5.1	4	18.07	3.88	22.8222	61.5	16.12	262.28	2
301	CKD	male	60	25.2595	CYP3A5*1/*3	A/G	1	155	80	1	116	5.8	4	17.19	3.62	22.4064	48.4	179.82	3716.83	3
302	CKD	female	59	21.8787	CYP3A5*1/*3	A/G	0	169	79	1	103	6.5	5	14.44	3.33	13.2095	39.5	45.39	1150.28	3
303	CKD	female	64	21.0937	CYP3A5*3/*3	G/G	0	156	79	1	132	7.9	5	14.41	3.24	14.9537	63.5	26.7	420.47	3
304	CKD	male	64	23.7943	CYP3A5*3/*3	G/G	1	163	78	1	169	6.4	5	14.38	4.1	14.3401	76.5	83.76	1095.47	3
305	CKD	male	56	16.5289	CYP3A5*3/*3	G/G	0	134	62	0	53	6.1	5	13	4.67	11.242	23.5	0.71	30.24	2
306	CKD	female	52	19.7035	CYP3A5*3/*3	G/G	1	124	71	1	114	6.1	5	12.93	3.8	11.4825	44.8	67.15	1499.55	3
307	CKD	male	59	22.3214	CYP3A5*3/*3	G/G	1	130	70	0	84	6.1	5	12.83	4.64	15.2748	118.1	55.04	465.97	3
308	CKD	female	46	21.5601	CYP3A5*1/*1	A/A	0	140	88	0	87	5.5	5	12.56	4.03	14.3741	52.1	14.19	272.26	2
309	CKD	male	64	25.6055	CYP3A5*1/*3	A/G	1	160	57	1	88	5.8	5	12.01	4.76	16.4099	86.5	95.12	1100.03	3
310	CKD	male	65	20.5499	CYP3A5*1/*1	A/A	1	141	73	0	90	5.5	5	11.26	4.99	12.1075	81.3	42.32	520.86	3
311	CKD	male	68	28.0277	CYP3A5*3/*3	G/G	0	145	78	1	120	7.3	5	11.22	4.92	16.4634	143.8	115.2	800.95	3
312	CKD	male	44	35.0884	CYP3A5*3/*3	G/G	0	129	66	1	123	8.1	5	10.86	5.81	19.346	83.1	123.02	1480.21	3
313	CKD	male	76	22.4343	CYP3A5*3/*3	G/G	0	137	68	1	115	6.4	5	10.37	5.01	11.6389	158.8	122.37	770.69	3
314	CKD	female	63	22.0386	CYP3A5*3/*3	G/G	1	149	70	0	84	4.9	5	9.91	4.44	12.2842	41.7	45.96	1101.63	3
315	CKD	male	62	26.0952	CYP3A5*3/*3	G/G	1	159	87	0	81	5.7	5	9.57	5.81	14.3947	68.1	137.71	2021.58	3
316	CKD	female	69	23.8343	CYP3A5*1/*3	A/G	0	147	84	1	120	6.8	5	9.3	4.52	11.0338	44.9	62.02	1381.6	3
317	CKD	female	43	22.9071	CYP3A5*3/*3	G/G	1	134	81	0	114	5.5	5	9.03	5.42	10.4584	45.2	53.59	1185.36	3
318	CKD	male	68	22.4813	CYP3A5*3/*3	G/G	1	131	73	0	96	5.3	5	8.99	5.91	9.98308	125.8	47.18	375.07	3
319	CKD	female	43	16.6493	CYP3A5*1/*1	A/A	1	123	82	0	79	5	5	8.88	5.46	8.3893	25.5	4.11	161.11	2
320	CKD	male	72	23.1405	CYP3A5*1/*3	A/G	0	156	73	1	57	7.1	5	8.83	5.86	10.1536	50.9	112.47	2209.19	3
321	CKD	male	55	21.6713	CYP3A5*3/*3	G/G	0	162	83	0	118	5.3	5	8.52	6.66	10.4584	113	386.29	3417.89	3
322	CKD	female	73	26.8386	CYP3A5*1/*3	A/G	1	138	57	1	112	6	5	8.14	4.93	10.7495	64.2	371.79	5794.73	3
323	CKD	male	67	20.4294	CYP3A5*3/*3	G/G	0	159	63	1	129	6.8	5	7.34	7.03	7.35538	142.2	50.33	353.91	3
324	CKD	female	76	22.6562	CYP3A5*3/*3	G/G	1	192	82	1	88	5.5	5	7.32	5.29	8.28397	43.6	181.4	4157.69	3
325	CKD	male	58	23.939	CYP3A5*3/*3	G/G	0	154	69	1	113	5.3	5	7.1	7.61	10.476	116.8	187.73	1607.42	3
326	CKD	male	76	NA	CYP3A5*3/*3	G/G	0	186	73	0	99	5.6	5	6.34	7.53	NA	44.8	55.99	1249.5	3
327	CKD	male	73	22.8516	CYP3A5*3/*3	G/G	1	146	59	1	83	6.2	5	5.84	8.2	6.63872	146.9	366.16	2492.24	3
328	CKD	male	65	NA	CYP3A5*3/*3	G/G	0	162	80	1	320	9.1	5	5.01	9.75	NA	82.9	67.63	816.1	3
329	CKD	female	50	30.7574	CYP3A5*1/*3	A/G	1	182	97	0	86	4.8	5	3.67	10.89	7.02479	60.6	33.06	545.45	3
